# Supplementary material
Source: publisher site journal article supplement (https://www.dovepress.com/article/489880)
Supplement: Supplementary file 1 [file get_supplementary_file.php]

# Supplementary Materials

**sTable 1** PRISMA Checklist

**sTable 2** Search strategies.

**sTable 3** Risk of Bias

**sTable 4** Subgroup analysis of angina attack frequency.

**sFigure 1** Forest plot of compassion between acupuncture and control in adverse events.

**sFigure 2** Forest plot of compassion between acupuncture and control in total effectiveness.

**sFigure 3** Funnel plot of trials meeting inclusion criteria in angina attack frequency.

**sTable 1 PRISMA Checklist**

| **Section and Topic** | **Item #** | **Checklist item** | **Location where item is reported** |
| --- | --- | --- | --- |
| **TITLE** | | |  |
| Title | 1 | Identify the report as a systematic review. | Page 1 |
| **ABSTRACT** | | |  |
| Abstract | 2 | See the PRISMA 2020 for Abstracts checklist. | Page 4 |
| **INTRODUCTION** | | |  |
| Rationale | 3 | Describe the rationale for the review in the context of existing knowledge. | Page 3 |
| Objectives | 4 | Provide an explicit statement of the objective(s) or question(s) the review addresses. | Page 3 |
| **METHODS** | | |  |
| Eligibility criteria | 5 | Specify the inclusion and exclusion criteria for the review and how studies were grouped for the syntheses. | Page 4 |
| Information sources | 6 | Specify all databases, registers, websites, organisations, reference lists and other sources searched or consulted to identify studies. Specify the date when each source was last searched or consulted. | Page 5 |
| Search strategy | 7 | Present the full search strategies for all databases, registers and websites, including any filters and limits used. | Page 4 |
| Selection process | 8 | Specify the methods used to decide whether a study met the inclusion criteria of the review, including how many reviewers screened each record and each report retrieved, whether they worked independently, and if applicable, details of automation tools used in the process. | Page 5 |
| Data collection process | 9 | Specify the methods used to collect data from reports, including how many reviewers collected data from each report, whether they worked independently, any processes for obtaining or confirming data from study investigators, and if applicable, details of automation tools used in the process. | Page 5 |
| Data items | 10a | List and define all outcomes for which data were sought. Specify whether all results that were compatible with each outcome domain in each study were sought (e.g. for all measures, time points, analyses), and if not, the methods used to decide which results to collect. | Page 5 |
| 10b | List and define all other variables for which data were sought (e.g. participant and intervention characteristics, funding sources). Describe any assumptions made about any missing or unclear information. | Page 5 |
| Study risk of bias assessment | 11 | Specify the methods used to assess risk of bias in the included studies, including details of the tool(s) used, how many reviewers assessed each study and whether they worked independently, and if applicable, details of automation tools used in the process. | Page 6 |
| Effect measures | 12 | Specify for each outcome the effect measure(s) (e.g. risk ratio, mean difference) used in the synthesis or presentation of results. | Page 7 |
| Synthesis methods | 13a | Describe the processes used to decide which studies were eligible for each synthesis (e.g. tabulating the study intervention characteristics and comparing against the planned groups for each synthesis (item #5)). | Page 7 |
| 13b | Describe any methods required to prepare the data for presentation or synthesis, such as handling of missing summary statistics, or data conversions. | Page 4 |
| 13c | Describe any methods used to tabulate or visually display results of individual studies and syntheses. | Page 7 |
| 13d | Describe any methods used to synthesize results and provide a rationale for the choice(s). If meta-analysis was performed, describe the model(s), method(s) to identify the presence and extent of statistical heterogeneity, and software package(s) used. | Page7 |
| 13e | Describe any methods used to explore possible causes of heterogeneity among study results (e.g. subgroup analysis, meta-regression). | Page 7 |
| 13f | Describe any sensitivity analyses conducted to assess robustness of the synthesized results. | NA |
| Reporting bias assessment | 14 | Describe any methods used to assess risk of bias due to missing results in a synthesis (arising from reporting biases). | Page 7 |
| Certainty assessment | 15 | Describe any methods used to assess certainty (or confidence) in the body of evidence for an outcome. | Page 6-7 |
| **RESULTS** | | |  |
| Study selection | 16a | Describe the results of the search and selection process, from the number of records identified in the search to the number of studies included in the review, ideally using a flow diagram. | Page 7-8 |
| 16b | Cite studies that might appear to meet the inclusion criteria, but which were excluded, and explain why they were excluded. | Page 8 |
| Study characteristics | 17 | Cite each included study and present its characteristics. | Page 8 |
| Risk of bias in studies | 18 | Present assessments of risk of bias for each included study. | Page 8-9 |
| Results of individual studies | 19 | For all outcomes, present, for each study: (a) summary statistics for each group (where appropriate) and (b) an effect estimate and its precision (e.g. confidence/credible interval), ideally using structured tables or plots. | Page 9-13 |
| Results of syntheses | 20a | For each synthesis, briefly summarise the characteristics and risk of bias among contributing studies. | Page 9 |
| 20b | Present results of all statistical syntheses conducted. If meta-analysis was done, present for each the summary estimate and its precision (e.g. confidence/credible interval) and measures of statistical heterogeneity. If comparing groups, describe the direction of the effect. | Page 9-13 |
| 20c | Present results of all investigations of possible causes of heterogeneity among study results. | Page 9-13 |
| 20d | Present results of all sensitivity analyses conducted to assess the robustness of the synthesized results. | Page 13 |
| Reporting biases | 21 | Present assessments of risk of bias due to missing results (arising from reporting biases) for each synthesis assessed. | Page 13 |
| Certainty of evidence | 22 | Present assessments of certainty (or confidence) in the body of evidence for each outcome assessed. | Page 13 |
| **DISCUSSION** | | |  |
| Discussion | 23a | Provide a general interpretation of the results in the context of other evidence. | Page 14 |
| 23b | Discuss any limitations of the evidence included in the review. | Page 17 |
| 23c | Discuss any limitations of the review processes used. | Page 17 |
| 23d | Discuss implications of the results for practice, policy, and future research. | Page 17 |
| **OTHER INFORMATION** | | |  |
| Registration and protocol | 24a | Provide registration information for the review, including register name and registration number, or state that the review was not registered. | Page 2 |
| 24b | Indicate where the review protocol can be accessed, or state that a protocol was not prepared. | Page 2 |
| 24c | Describe and explain any amendments to information provided at registration or in the protocol. | NA |
| Support | 25 | Describe sources of financial or non-financial support for the review, and the role of the funders or sponsors in the review. | Page 18 |
| Competing interests | 26 | Declare any competing interests of review authors. | Page 18 |
| Availability of data, code and other materials | 27 | Report which of the following are publicly available and where they can be found: template data collection forms; data extracted from included studies; data used for all analyses; analytic code; any other materials used in the review. | Page 18 |

**sTable 2 Search strategies**

| **PubMed search strategy (****Oct 31, 2024) =158** |
| --- |
| 1. **(((((((((((((((stable angina pectoris[MeSH Terms]) OR (Anginas, Stable[Title/Abstract])) OR (Stable Angina[Title/Abstract])) OR (Stable Anginas[Title/Abstract])) OR (Chronic Stable Angina[Title/Abstract])) OR (Angina, Chronic Stable[Title/Abstract])) OR (Anginas, Chronic Stable[Title/Abstract])) OR (Chronic Stable Anginas[Title/Abstract])) OR (Stable Angina, Chronic[Title/Abstract])) OR (Stable Angina, Chronic[Title/Abstract])) OR (Angina Pectoris, Stable[Title/Abstract])) OR (Angina Pectori, Stable[Title/Abstract])) OR (Pectori, Stable Angina[Title/Abstract])) OR (Pectoris, Stable Angina[Title/Abstract])) OR (Stable Angina Pectori[Title/Abstract])) OR (Stable Angina Pectoris[Title/Abstract])** 2. **(((((acupuncture [MeSH Terms]) OR (Acupuncture Therapy [MeSH Terms])) OR (Acupuncture Points [MeSH Terms])) OR (Acupressure [MeSH Terms])) OR (Electroacupuncture [MeSH Terms])) OR (Moxibustion [MeSH Terms])** 3. **(((((meridian[MeSH Terms]) OR (meridian*[Title/Abstract])) OR (Ching Lo[Title/Abstract])) OR (Jing Luo[Title/Abstract])) OR (Luo, Jing[Title/Abstract])) OR (Jingluo[Title/Abstract])** 4. (((((((((((((((((((Pharmacopuncture [Title/Abstract]) OR (Acupuncture Treatment [Title/Abstract])) OR (Laser acupuncture [Title/Abstract])) OR (Acupuncture Treatments [Title/Abstract])) OR (Treatment, Acupuncture[Title/Abstract])) OR (Therapy, Acupuncture[Title/Abstract])) OR (Pharmacoacupuncture Treatment [Title/Abstract])) OR (Treatment, Pharmacoacupuncture [Title/Abstract])) OR (Pharmacoacupuncture Therapy [Title/Abstract])) OR (Therapy, Pharmacoacupuncture [Title/Abstract])) OR (Acupotomy [Title/Abstract])) OR (Acupotomies [Title/Abstract])) OR (Acupuncture Point [Title/Abstract])) OR (Point, Acupuncture [Title/Abstract])) OR (Points, Acupuncture [Title/Abstract])) OR (Acupoints [Title/Abstract])) OR (Acupoint [Title/Abstract])) OR (Shiatsu [Title/Abstract])) OR (Zhi Ya [Title/Abstract])) OR (Chih Ya [Title/Abstract])) OR (Shiatzu [Title/Abstract]) 5. ((acup*?point*[Title/Abstract]) OR (acup*[Title/Abstract])) OR (trigger adj3 point*[Title/Abstract]) 6. ((((((((((((((((((((Transcutaneous Electric Nerve Stimulation[MeSH Terms]) OR (Electric Stimulation, Transcutaneous[Title/Abstract])) OR (transcutaneous electr* stimulat*[Title/Abstract])) OR (nerve stimulat*[Title/Abstract])) OR (electro‐acupuncture[Title/Abstract])) OR (electroacupuncture[Title/Abstract])) OR (neuro‐modulation[Title/Abstract])) OR (neuromodulation[Title/Abstract])) OR (trans‐abdominal stimulat*[Title/Abstract])) OR (sacral nerve stimulat*[Title/Abstract])) OR (interferential electr* stimulat*[Title/Abstract])) OR (Electric Stimulation, Transcutaneous[Title/Abstract])) OR (Electric Stimulation, Transcutaneous[Title/Abstract])) OR (Percutaneous Electrical Nerve Stimulation[Title/Abstract])) OR (Transcutaneous Electrical Nerve Stimulation[Title/Abstract])) OR (Transcutaneous Nerve Stimulation[Title/Abstract])) OR (Nerve Stimulation, Transcutaneous[Title/Abstract])) OR (TENS[Title/Abstract])) OR (Percutaneous Neuromodulation Therapy[Title/Abstract])) OR (Neuromodulation Therapy, Percutaneous[Title/Abstract])) OR (Neuromodulation*, Percutaneous Electrical[Title/Abstract]) 7. #2 OR #3 OR #4 OR #5 OR #6 8. ((random allocation [MeSH Terms]) OR (clinical trials as topic [MeSH Terms])) OR (randomized controlled trial [Publication Type]) 9. #1 AND #7 AND #8 |
|  |
| **Cocharne search strategy (Oct 31, 2024) =31** |
| #1 MeSH descriptor: [Anginas, Stable] explode all trees  #2 (Stable Angina*):ti,ab,kw OR (Chronic Stable Angina):ti,ab,kw OR (Anginas, Chronic Stable):ti,ab,kw OR (Stable Angina, Chronic):ti,ab,kw OR (Angina Pectori*, Stable):ti,ab,kw OR (Stable Angina Pectoris): ti,ab,kw (Word variations have been searched)  #3 MeSH descriptor: [Acupuncture] explode all trees  #4 MeSH descriptor: [Acupuncture Points] explode all trees  #5 MeSH descriptor: [Acupuncture Therapy] explode all trees  #6 MeSH descriptor: [Acupuncture Therapy] explode all trees  #7 (Pharmacopuncture):ti,ab,kw OR (Acupuncture Treatment):ti,ab,kw OR (Laser Acupuncture):ti,ab,kw OR (Acupuncture Treatments):ti,ab,kw OR (Treatment, Acupuncture):ti,ab,kw OR (Therapy, Acupuncture):ti,ab,kw (Word variations have been searched)  #8 (Pharmacoacupuncture Treatment):ti,ab,kw OR (Treatment, Pharmacoacupuncture):ti,ab,kw OR (Pharmacoacupuncture Therapy):ti,ab,kw OR (Therapy, Pharmacoacupuncture):ti,ab,kw OR (Acupotomy):ti,ab,kw (Word variations have been searched)  #9 (Acupotomies):ti,ab,kw OR (Acupuncture Point):ti,ab,kw OR (Point, Acupuncture):ti,ab,kw OR (Points, Acupuncture):ti,ab,kw OR (Acupoints):ti,ab,kw (Word variations have been searched)  #10 (Acupoint):ti,ab,kw OR (Shiatsu):ti,ab,kw OR (Zhi Ya):ti,ab,kw OR (Chih Ya):ti,ab,kw AND (Shiatzu):ti,ab,kw (Word variations have been searched)  #11 (acup*?point*):ti,ab,kw OR (acup*):ti,ab,kw OR (trigger adj3 point*):ti,ab,kw  #12 ("nerve stimulat*"):ti,ab,kw OR (electroacupuncture):ti,ab,kw OR (neuro modulation):ti,ab,kw OR (electro*acupuncture):ti,ab,kw OR (neuromodulation):ti,ab,kw  #13 (transcutaneous electr* stimulat*):ti,ab,kw OR ("interferential electr* stimulat*"):ti,ab,kw  #14 MeSH descriptor: [Clinical Trials as Topic] explode all trees  #15 (randomized controlled trial):pt OR (randomized controlled trial):ti,ab,kw OR (random allocation):ti,ab,kw (Word variations have been searched)  #16 #1 OR #2  #17 #3 OR #4 OR #5 OR #6 OR #7 OR #8 OR #9 OR #10 OR #11 OR #12 OR #13  #18 #14 OR #15  #19 #16 AND #17 AND #18 |
|  |
| **Web of Science search strategy (Oct 31, 2024) = 26** |
| #1 TS=(stable angina pectoris OR Anginas, Stable OR stable Angina* OR Chronic Stable Angina OR Anginas, Chronic Stable OR Stable Angina, Chronic OR Angina Pectori*, Stable OR Stable Angina Pectoris)  #2 TS=(Acupuncture OR Pharmacopuncture OR Acupuncture Therapy OR Laser Acupuncture OR Acupuncture Treatment OR Acupuncture Treatments OR Treatment, Acupuncture OR Therapy, Acupuncture OR Pharmacoacupuncture Treatment OR Treatment, Pharmacoacupuncture OR Pharmacoacupuncture Therapy OR Therapy, Pharmacoacupuncture OR autotomy OR anulotomies OR Acupuncture Points OR Acupuncture Point OR Point, Acupuncture OR Points, Acupuncture OR Acupoints OR Acupoint OR Acupressure OR Shiatsu OR Zhi Ya OR chip Ya OR shiatsu)) OR TS=(meridian OR meridian* OR Ching Lo OR Jing Luo OR Luo, Jing OR Jingluo)) OR TS=(acup*?point* OR acup* OR trigger adj3 point*)  # 3 TS=(Transcutaneous Electric Nerve Stimulation OR Electric Stimulation, Transcutaneous OR transcutaneous electr* stimulat* OR nerve stimulat* OR electro‐acupuncture OR electroacupuncture OR neuro‐modulation OR neuromodulation OR trans‐abdominal stimulat* OR sacral nerve stimulat* OR interferential electr* stimulat* OR Electric Stimulation, Transcutaneous OR Electric Stimulation, Transcutaneous OR Percutaneous Electrical Nerve Stimulation OR Transcutaneous Electrical Nerve Stimulation OR Transcutaneous Nerve Stimulation OR Percutaneous Neuromodulation Therapy OR Neuromodulation Therapy, Percutaneous OR Neuromodulation*, Percutaneous Electrical)  #4 #2 OR #3  #5 (TS=(clinical trials as topic OR clinical trial OR random allocation OR RCT OR clin* OR randmization*) OR SO=(clin* OR randmization*))  #6 #1 OR #4 OR #5 |
|  |
| **EMBASE search strategy search strategy (Oct 31, 2024)) =18** |
| #1 ('stable angina pectoris'/exp OR 'angina, stable' OR 'stable angina' OR 'stable angina pectoris' OR 'stable angina*' OR 'chronic stable angina'/exp OR 'stable angina pectori*')  #2 ('acupuncture point'/exp OR 'acu-point' OR 'acu-point' OR  'Laser acupuncture' OR 'acupoints' OR 'acupuncture point' OR 'acupuncture points' OR 'point, acupuncture' OR 'pharmacopuncture'/exp OR 'herb acupuncture' OR 'herbal acupuncture' OR 'herbalized acupuncture' OR 'pharmaco-acupuncture' OR 'pharmaco-auncture' OR 'pharmacoacupuncture' OR 'pharmacopuncture' OR 'acupuncture'/exp OR 'acupuncture' OR 'acupuncture therapy' OR 'shonishin' OR 'acupotomy'/exp OR acupotomies OR 'acupressure'/exp OR 'acupressure' OR 'shiatsu'/exp OR 'shiatsu' OR 'chih ya' OR 'meridian'/exp OR 'meridian system'/exp OR 'jing luo' OR 'jingluo' OR 'meridian network' OR 'meridian system' OR 'meridian-collateral system' OR 'transcutaneous electr* stimulat*' OR 'nerve stimulation'/exp OR 'nerve stimulation' OR 'nerve stimulus' OR 'neurostimulation' OR 'peripheral nerve stimulation' OR 'stimulation, nerve' OR 'transcutaneous electrical nerve stimulation'/exp OR 'tens (transcutaneous electrical nerve stimulation)' OR 'electrostimulation, transcutaneous' OR 'nerve stimulation, transcutaneous' OR 'percutaneous electric nerve stimulation' OR 'percutaneous electrical nerve stimulation' OR 'transcutaneous electric nerve stimulation' OR 'transcutaneous electrical nerve stimulation' OR 'transcutaneous electrical stimulation' OR 'transcutaneous electrostimulation' OR 'transcutaneous nerve stimulation')  #3 ('clinical trial (topic)'/exp OR 'clinical trial (topic)' OR 'clinical trials' OR 'clinical trials as topic' OR 'randomization'/expOR 'random allocation' OR 'randomisation' OR 'randomization')  #1 AND #2 AND #3 |
|  |
| **Clinicaltrail.gov strategy search strategy (Oct 31, 2024) =4** |
| (stable angina pectoris OR Anginas, Stable OR stable Angina* OR Chronic Stable Angina OR Anginas, Chronic Stable OR Stable Angina, Chronic OR Angina Pectori*, Stable OR Stable Angina Pectoris) AND (Acupuncture OR Pharmacopuncture OR Acupuncture Therapy OR Laser Acupuncture OR Acupuncture Treatment OR Acupuncture Treatments OR Treatment, Acupuncture OR Therapy, Acupuncture OR Pharmacoacupuncture Treatment OR Treatment, Pharmacoacupuncture OR Pharmacoacupuncture Therapy OR Therapy, Pharmacoacupuncture OR autotomy OR anulotomies OR Acupuncture Points OR Acupuncture Point OR Point, Acupuncture OR Points, Acupuncture OR Acupoints OR Acupoint OR Acupressure OR Shiatsu OR Zhi Ya OR chip Ya OR shiatsu)) OR TS=(meridian OR meridian* OR Ching Lo OR Jing Luo OR Luo, Jing OR Jingluo)) OR TS=(acup*?point* OR acup* OR trigger adj3 point* OR Transcutaneous Electric Nerve Stimulation OR Electric Stimulation, Transcutaneous OR transcutaneous electr* stimulat* OR nerve stimulat* OR electro‐acupuncture OR electroacupuncture OR neuro‐modulation OR neuromodulation OR trans‐abdominal stimulat* OR sacral nerve stimulat* OR interferential electr* stimulat* OR Electric Stimulation, Transcutaneous OR Electric Stimulation, Transcutaneous OR Percutaneous Electrical Nerve Stimulation OR Transcutaneous Electrical Nerve Stimulation OR Transcutaneous Nerve Stimulation OR Percutaneous Neuromodulation Therapy OR Neuromodulation Therapy, Percutaneous OR Neuromodulation*, Percutaneous Electrical) | Interventional Studies | |
|  |
| **CNKI search strategy (Oct 31, 2024)=278** |
| (SU=Angina Pectoris + Stable Chronic Angina + CSA) AND (SU=Acupuncture + Acupuncture Therapy + Needle Technique + Acupuncture + Moxibustion + Transcutaneous Electrical Nerve Stimulation + Acupoint Therapy + Acupoint + Electroacupuncture + Laser acupuncture +Auricular Acupuncture + Acupoint Stimulation + Meridian + Shu Point) AND (TKA=Randomized Controlled Trial + Clinical Research + Clinical Trial + RCT) |
|  |
| **Wanfang Database search strategy (Oct 31, 2024) =52** |
| All: (Angina Pectoris + Stable Chronic Angina + CSA) and All: (Acupuncture OR Acupuncture Therapy OR Needle Technique OR Acupuncture OR Laser acupuncture OR Moxibustion OR Transcutaneous Electrical Nerve Stimulation OR Acupoint Therapy OR Acupoint OR Electroacupuncture OR Auricular Acupuncture OR Acupoint Stimulation OR Meridian OR Shu Point) and All: (Randomized Controlled Trial OR Clinical Research OR Clinical Trial OR RCT) |
| **CBM search strategy (Oct 31, 2024)=188** |
| ("Acupuncture"[Common Fields: Intelligent] OR "Acupuncture Therapy"[Common Fields: Intelligent] OR "Needle Technique"[Common Fields: Intelligent] OR "Acupuncture"[Common Fields: Intelligent] OR "Moxibustion"[Common Fields: Intelligent] OR "Transcutaneous Electrical Nerve Stimulation"[Common Fields: Intelligent] OR "Acupoint Therapy"[Common Fields: Intelligent] OR "Laser acupuncture" OR "Acupoint"[Common Fields: Intelligent] OR "Electroacupuncture"[Common Fields: Intelligent] OR "Auricular Acupuncture"[Common Fields: Intelligent] OR "Acupoint Stimulation"[Common Fields: Intelligent] OR "Meridian"[Common Fields: Intelligent] OR "Shu Point"[Common Fields: Intelligent]) AND "Angina Pectoris"[Common Fields: Intelligent] AND ("Randomized Controlled Trial"[Common Fields: Intelligent] OR "Clinical Research"[Common Fields: Intelligent] OR "Clinical Trial"[Common Fields: Intelligent] OR "RCT"[Common Fields: Intelligent])  Secondary search conditions: ("Acupuncture"[Common Fields: Intelligent] OR "Acupuncture Therapy"[Common Fields: Intelligent] OR "Needle Technique"[Common Fields: Intelligent] OR "Acupuncture"[Common Fields: Intelligent] OR "Moxibustion"[Common Fields: Intelligent] OR "Transcutaneous Electrical Nerve Stimulation"[Common Fields: Intelligent] OR "Acupoint Therapy"[Common Fields: Intelligent] OR "Acupoint"[Common Fields: Intelligent] OR "Electroacupuncture"[Common Fields: Intelligent] OR "Auricular Acupuncture"[Common Fields: Intelligent] OR "Acupoint Stimulation"[Common Fields: Intelligent] OR "Meridian"[Common Fields: Intelligent] OR "Shu Point"[Common Fields: Intelligent]) AND "Angina Pectoris"[Common Fields: Intelligent] AND ("Randomized Controlled Trial"[Common Fields: Intelligent] OR "Clinical Research"[Common Fields: Intelligent] OR "Clinical Trial"[Common Fields: Intelligent] OR "RCT"[Common Fields: Intelligent]) |
| **VIP search strategy (Oct 31, 2024) =42** |
| (Title or Keywords:(Angina Pectoris + Stable Chronic Angina + CSA)) AND (Title or Keywords:(Acupuncture Therapy OR Acupuncture OR Moxibustion OR Transcutaneous Electrical Nerve Stimulation OR Acupoint Therapy OR Acupoint OR Laser acupuncture OR Acupuncture OR Electroacupuncture OR Auricular Acupuncture OR Acupoint Stimulation)) AND (Title or Keywords: (Randomized Controlled Trial OR Clinical Research OR Clinical Trial OR RCT)) |

**sTable 3 Risk of Bias**

| Study ID | Random sequence generation (selection bias) | | Allocation concealment (selection bias) | Blinding of participants and personnel  (performance bias) | Blinding of outcome assessment (detection bias) | Incomplete outcome data (attribution bias) | Selective reporting (reporting bias) | Other bias |
| --- | --- | --- | --- | --- | --- | --- | --- | --- |
| Ballegaard, 1986 28 | | Unclear risk | Unclear risk | Low risk | Unclear risk | Low risk | Low risk | Low risk |
| Chen, 2015 30 | Low risk | | Low risk | Low risk a | Low risk | Low risk | Low risk | Low risk |
| Wang, 2015 31 | Low risk | | Low risk | High risk | Low risk | Low risk | Low risk | Low risk |
| Jing, 2016 32 | Low risk | | Unclear risk | Low risk | Low risk | Low risk | Low risk | Low risk |
| Wu, 2016 18 | Low risk | | Unclear risk | High risk | Unclear risk | Low risk | Low risk | Low risk |
| Xie, 2016 15 | Low risk | | Unclear risk | High risk | Unclear risk | Low risk | Low risk | Low risk |
| Yao, 2016 33 | Unclear risk b | | Unclear risk | High risk | Unclear risk | Low risk | Low risk | Low risk |
| Zhang, 2016 34 | Low risk | | Low risk | Low risk a | Low risk | Low risk | Low risk | Low risk |
| Chen, 2017 35 | Low risk | | Unclear risk | Low risk | Low risk | Low risk | Low risk | Low risk |
| Yin, 2018 36 | Low risk | | Unclear risk | Low risk | Low risk | Low risk | Low risk | Low risk |
| Zhang, 2018 37 | Low risk | | Unclear risk | Low risk a | Unclear risk | Low risk | Low risk | Low risk |
| Zhao, 2019 17 | Low risk | | Low risk | Low risk a | Low risk | Low risk | Low risk | Low risk |
| Ye, 2020 16 | Low risk | | Unclear risk | High risk | Unclear risk | Low risk | Low risk | Low risk |
| Huang, 2021 38 | Low risk | | Low risk | Low risk | Unclear risk | High risk a | Low risk | Low risk |
| DeVon, 2022 19 | Low risk | | Unclear risk | High risk | Unclear risk | Low risk | Low risk | Low risk |
| Lan, 2022 11 | Low risk | | Unclear risk | Low risk | Unclear risk | Low risk | Low risk | Low risk |

Footnotes: a two compared control groups were conducted in these studies. For Acupuncture compared with the placebo group, the performance bias was low, and for acupuncture compared with the standard care group, the performance bias was high. b the participants were randomized by simple randomization without random sequence generation details. c six patients in the high sensitivity group (HSG) and 6 patients in the low sensitivity group (LSG) were withdrawn for personal reasons. the authors didn’t synthesize the per-protocol population set.

**sTable 4 Subgroup analysis of angina attack frequency**

| **Items** | **N** | **SMD (95%CI)** | ***I2*** | ***P*** |
| --- | --- | --- | --- | --- |
| ***No. of acupoints*** | | | | |
| ≤ 5.8 | 14 | -0.79 (-1.11, -0.47) | 83% | < 0.0001 |
| Ac vs. Placebo Ac | 8 | -0.60 (-0.91, -0.29) | 60% | 0.0001 |
| Ac vs. Standard care | 6 | -1.05 (-1.67, -0.44) | 90% | 0.0008 |
| >5.8 | 3 | -0.76 (-2.33,0.81) | 97% | 0.34 |
| Ac vs. Placebo Ac | 2 | -0.07 (-0.51, 0.38) | 36% | 0.77 |
| Ac vs. Standard care | 1 | -2.37 (-2.84, -1.89) | NA | < 0.0001 |
| ***Frequency of acupuncture*** | | | | |
| ≤ 4 times per week | 13 | -0.74 (-1.09, -0.39) | 87% | < 0.0001 |
| Ac vs. Placebo Ac | 7 | -0.49 (-0.85, -0.13) | 77% | 0.008 |
| Ac vs. Standard care | 6 | -1.05 (-1.67, -0.44) | 90% | 0.0008 |
| > 4 times per week | 4 | -0.67 (-1.75, 0.41) | 92% | 0.22 |
| Ac vs. Placebo Ac | 3 | -0.22 (-0.61, 0.16) | 8% | 0.26 |
| Ac vs. Standard care | 1 | -2.37 (-2.84, -1.89) | NA | < 0.0001 |
| ***Total sessions of acupuncture*** | | | | |
| ≤ 16 | 16 | -0.68 (-0.99, 0.38) | 85% | < 0.0001 |
| Ac vs. Placebo Ac | 10 | -0.47 (-0.75, -0.19) | 67% | 0.001 |
| Ac vs. Standard care | 6 | -1.05 (-1.67, -0.44) | 90% | 0.0008 |
| > 16 | 1 | -2.37 (-2.84, -1.89) | NA | < 0.0001 |
| Ac vs. Placebo Ac | 0 | / | / | / |
| Ac vs. Standard care | 1 | -2.37 (-2.84, -1.89) | NA | < 0.0001 |
| ***Mode of acupuncture*** |  |  |  |  |
| Electroacupuncture | 8 | -0.88(-1.31,-0.46) | 85% | < 0.0001 |
| Ac vs. Placebo Ac | 5 | -0.69(-1.11,-0.27) | 0% | 0.61 |
| Ac vs. Standard care | 3 | -4.72(-5.58,-3.86) | 0% | 0.84 |
| Manual acupuncture | 9 | -0.58(-1.22,0.05) | 90% | < 0.0001 |
| Ac vs. Placebo Ac | 5 | -0.69(-1.49,0.12) | 0% | 0.52 |
| Ac vs. Standard care | 4 | -1.01(-2.12,0.10) | 55% | 0.09 |

Footnotes: N, number of the included studies; Ac, acupuncture; NA, not applicable.

**
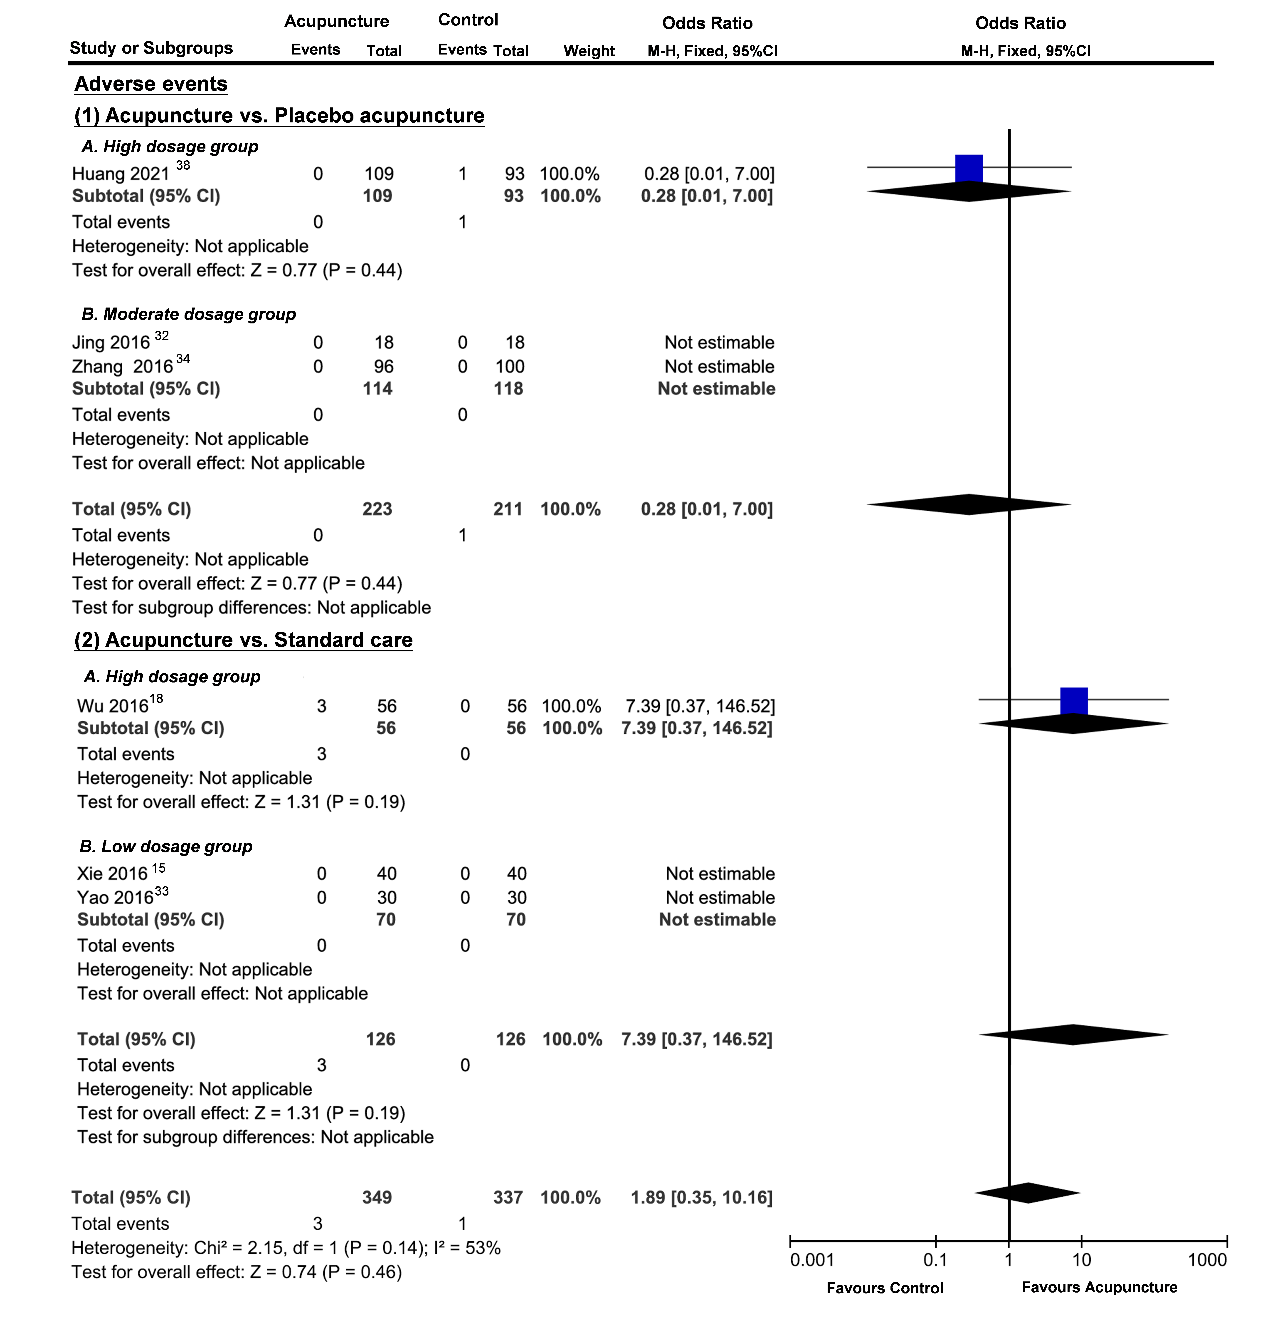
**

**sFigure 1 Forest plot of compassion between acupuncture and control in adverse events.**

**
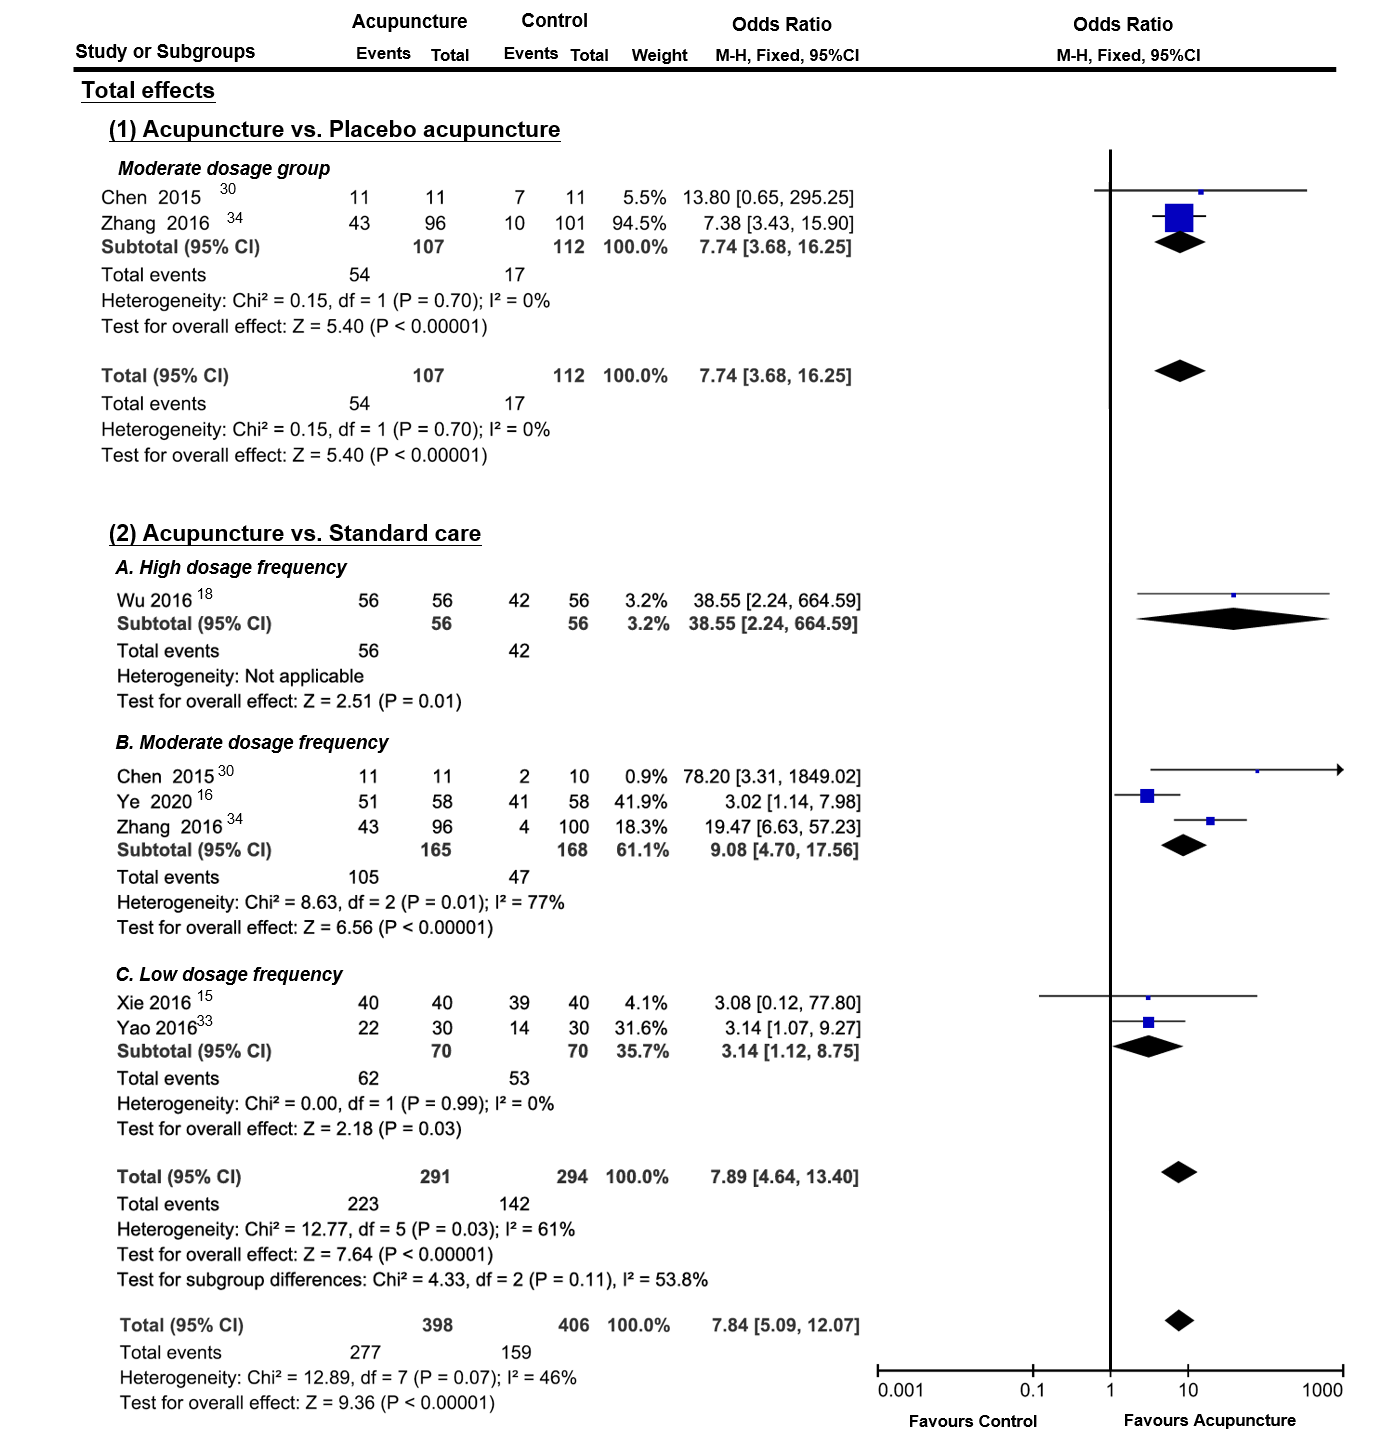
sFigure 2 Forest plot of compassion between acupuncture and control in total effectiveness.**


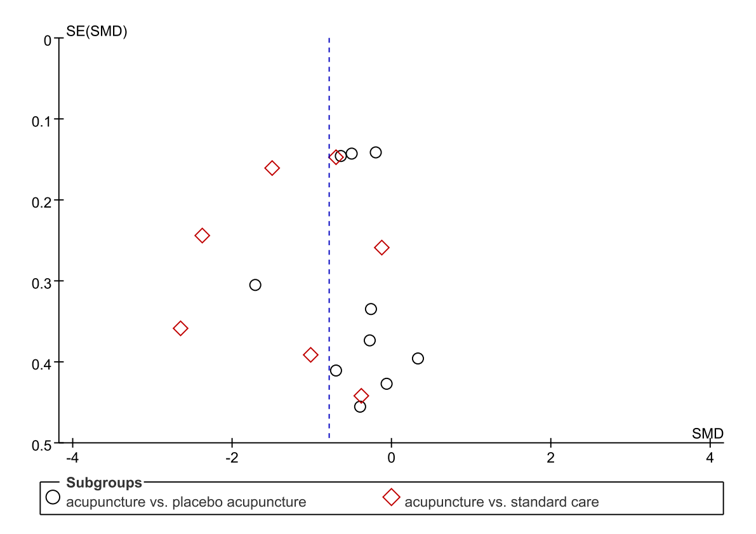
 **sFigure 3 Funnel plot of trials meeting inclusion criteria in angina attack frequency.** SMD = Standard Mean Difference.
